# Supplementary material for: Prospects and limits of marker imputation in quantitative genetic studies in European elite wheat (Triticum aestivum L.)
Source: PubMed Central journal article supplement (PMC4364688; doi:10.1186/s12864-015-1366-y), 2015-03-11
Supplement: 12864_2015_1366_MOESM4_ESM.pdf [file 12864_2015_1366_MOESM4_ESM.pdf]

**Table S1** Correlation between Rogers' distance matrices for imputation in a GBS-like scenario.

| Algorithm     | 72.8% | 61.5% | 38.8% | 16.1% |
|---------------|-------|-------|-------|-------|
|               | cor   | cor   | cor   | cor   |
| Non-imputed   | 0.94  | 0.97  | 0.99  | 1.00  |
| Beagle        | 0.98  | 0.99  | 1.00  | 1.00  |
| Flmpute       | 0.98  | 0.99  | 1.00  | 1.00  |
| IMPUTE2       | 0.99  | 0.99  | 1.00  | 1.00  |
| Random Forest | 0.89  | 0.95  | 0.99  | 1.00  |

Estimation was done for the total population of 371 lines based on imputed panels or non-imputed, and the original 90k SNP marker data sets. Different imputed marker data sets were generated using map-based algorithms Beagle, Flmpute, and IMPUTE2 as well as map-independent algorithm Random Forest for missing data rates of 72.8%, 61.5%, 38.8%, and 16.1%. All the correlations were significantly larger than zero ( $P < 0.01$ ) according to a Mantel test.
